# Supplementary material
Source: PubMed Central journal article supplement (PMC3328200)
Supplement: NIHMS314862-supplement-2.pdf [file NIHMS314862-supplement-2.pdf]

**Figure 5.** Individual deletion of seven *etramps* in blood stages and passage through mosquito and liver stages reveals no critical function in any stage. (A) Generalized schematic representation of the strategy used to replace *P. yoelii* *etramp* ORFs with TgDHFR/TS. (B) Genotyping of *etramp* KO blood stage parasites before (“Input”) and after (“Output”) passage through mosquito and liver stages. The presence of knockout parasites in the output blood stages indicates that each individual *etramp* is not essential for completion of the parasite life cycle. Specific oligonucleotide primer amplicons indicated in (A) are used to test for integration of the KO construct from the 5’ end or 3’ end, and also to test for the presence of the endogenous *etramp* ORF. PY03652<sup>-</sup> and PY04799<sup>-</sup> parasites were analyzed as clones; the remaining strains were analyzed as mixed parental populations of gene deletion parasites and WT parasites, and therefore show evidence for both 5’ and 3’ integration, as well as the unmodified ORF, in different parasites.

**Figure S1.** Blood stage development of the PY03652<sup>-</sup> and PY04799<sup>-</sup> is comparable to wildtype. One million infected red blood cells isolated from infected Swiss Webster mice infected with either wildtype (WT), PY03652<sup>-</sup> or PY04799<sup>-</sup> parasites were injected intravenously into groups of five Swiss Webster mice. Parasitemia of the infected mice was determined by Giemsa-stained thin blood smear at successive days after the initial injection. The data show that there is no significant difference between the three parasite lines in their ability to propagate as blood stages in the mouse.

**Figure S2.** Development of late liver stage PY03652<sup>-</sup> and PY04799<sup>-</sup> parasites is not inhibited, based on size, when compared to WT. Liver sections were labeled with anti-Hep17 antibody, and DAPI (to label DNA). A differential interference contrast (DIC) image of the liver section is shown to the right. Scale bar = 5 micrometers.

## Supporting information

Table S1. A list of all etramps genes identified from the PFAM database and edited to remove redundant or spurious entries.

Table S2. A list of all primer sequences used in this study.

Table S3. Numbers of sporozoites produced per mosquito in PY03652<sup>-</sup> or PY04799<sup>-</sup> clones compared to those produced by WT *P. yoelii*. The data are the average number of sporozoites per mosquito obtained by dissecting at least 25 mosquitoes.

Supplementary Figure 1. Blood stage growth of PY03652<sup>-</sup> or PY04799<sup>-</sup> clone parasites is similar to the rate of blood stage growth for *P. yoelii* WT *in vivo*.

Supplementary Figure 2. Liver stage growth of PY03652<sup>-</sup> or PY04799<sup>-</sup> clone parasites is similar to the rate of liver stage growth for *P. yoelii* WT *in vivo*.

Supplementary Video 1. A three-dimensional reconstruction of a stack of images taken from an erythrocyte infected with a PY03652myc schizont. The stack is rotated 180 degrees through the Y axis, and back. The myc signal is in red, the MSP1 in green, and DAPI in blue. The myc signal appears as individual foci within the daughter merozoites, likely in secretory organelles; the protein is not forming a continuous network in three dimensions that could be misrepresented in a single cross-sectional image.

Type of file: figure

Label: Figure 01-05, Table 01-02 & Supp Figure S1-S2, Table S1-S3

Filename: cmi\_1656\_figures and tables.pdf

**Figure S1**

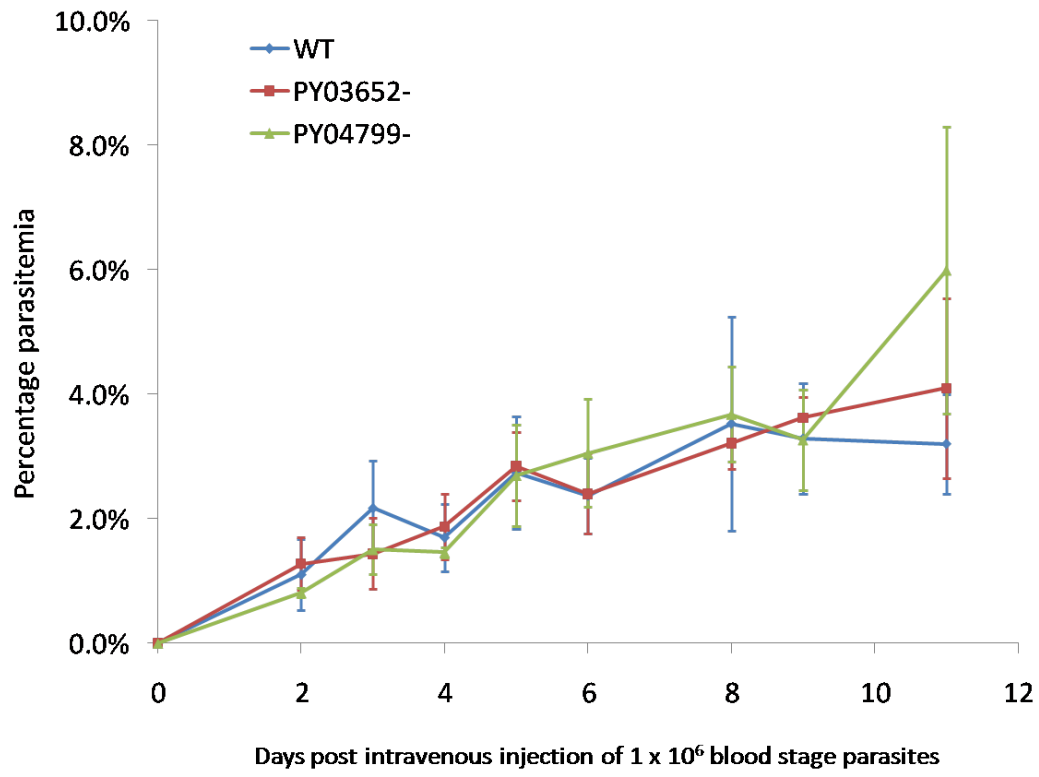

**Figure S2**

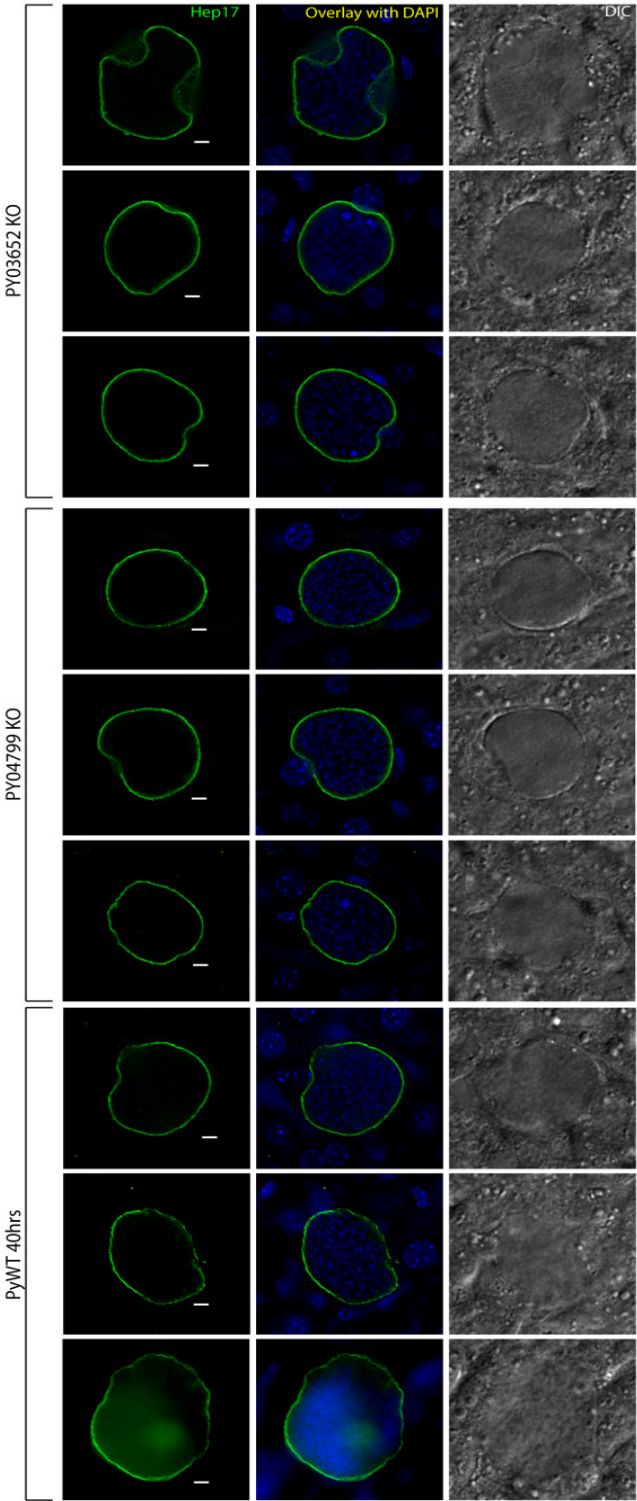

**Table S1.** A list of all etramps genes identified from the PFAM database and edited to remove redundant or spurious entries.

| Species              | Name       | NCBI         | PlasmoDB            | OrthoMCL   | Uniprot |
|----------------------|------------|--------------|---------------------|------------|---------|
| <i>P. berghei</i>    | PbUIS4     | XM_673549    | PB100551.00.0       | OG_84497   | -       |
| <i>P. berghei</i>    | -          | XM_668793    | PB402471.00.0       | OG4_50898  | Q4YIJ4  |
| <i>P. berghei</i>    | -          | XM_673321    | PB105376.00.0       | OG4_60733  | Q4YK90  |
| <i>P. berghei</i>    | PbUIS3     | XM_669589    | PB000892.03.0       | OG4_48314  | Q4YNP1  |
| <i>P. berghei</i>    | -          | XM_674919    | PB106570.00.0       | OG4_50898  | Q4YT14  |
| <i>P. berghei</i>    | PbSEP3     | AJ420907     | PB_RP0267:2295-2759 | -          | Q8MNY3  |
| <i>P. berghei</i>    | PbSEP2     | XM_670193    | PB106367.00.0       | OG4_64898  | Q8MNY4  |
| <i>P. berghei</i>    | PbSEP1     | XM_674012    | PB100384.00.0       | OG4_60511  | Q8MNY5  |
| <i>P. chabaudi</i>   | -          | -            | PCHAS_146830        | OG4_48457  | -       |
| <i>P. chabaudi</i>   | -          | -            | PCHAS_093790        | OG4_48457  | -       |
| <i>P. chabaudi</i>   | -          | -            | PCHAS_000550        | OG4_60733  | Q25666  |
| <i>P. chabaudi</i>   | -          | XM_740585    | PC105586.00.0       | -          | Q4XVR0  |
| <i>P. chabaudi</i>   | -          | -            | PCHAS_050120        | OG4_60511  | Q4XXC4  |
| <i>P. chabaudi</i>   | -          | XM_739639    | PC104072.00.0       | OG4_50898  | Q4XZA0  |
| <i>P. chabaudi</i>   | PcUIS3     | XM_732037    | PCHAS_140270        | OG4_49314  | Q4Y4D5  |
| <i>P. chabaudi</i>   | -          | XM_739810    | PC100816.00.0       | -          | Q4Y781  |
| <i>P. chabaudi</i>   | -          | -            | PC10115w            | -          | Q7YZ77  |
| <i>P. chabaudi</i>   | -          | AY149018     | PCHAS_001130        | OG4_48457  | Q7Z1C7  |
| <i>P. chabaudi</i>   | -          | AY149017     | PCHAS_090040        | OG4_48457  | Q7Z1C8  |
| <i>P. chabaudi</i>   | -          | AY149016     | PCHAS_052450        | OG4_48457  | Q7Z1C9  |
| <i>P. falciparum</i> | etramp8    | XM_001349194 | MAL8P1.6            | OG4_84661  | C0H4Z2  |
| <i>P. falciparum</i> | etramp2    | XM_001349503 | PFB0120w            | OG4_54905  | O96128  |
| <i>P. falciparum</i> | etramp11.1 | XM_001347679 | PF11_0039           | OG4_60511  | Q7KQK8  |
| <i>P. falciparum</i> | etramp14.1 | XM_001348153 | PF14_0016           | OG4_118692 | Q7KQM5  |
| <i>P. falciparum</i> | "etramp9"  | XM_001352189 | PF11745c            | OG4_84706  | Q8I2F9  |
| <i>P. falciparum</i> | etramp5    | XM_001351833 | PFE1590w            | OG4_84523  | Q8I3F3  |
| <i>P. falciparum</i> | etramp12   | XM_001350759 | PFL1945c            | -          | Q8I522  |
| <i>P. falciparum</i> | etramp13   | XM_001349714 | PF13_0012           | OG4_48314  | Q8IEU1  |
| <i>P. falciparum</i> | etramp4    | XM_001351504 | PFD1120c            | OG4_64898  | Q8IFM9  |
| <i>P. falciparum</i> | etramp11.2 | XM_001347680 | PF11_0040           | OG4_54905  | Q8IIX3  |
| <i>P. falciparum</i> | etramp10.2 | XM_001347571 | PF10_0323           | OG4_49514  | Q8IJ76  |
| <i>P. falciparum</i> | etramp10.3 | XM_001347413 | PF10_0164           | -          | Q8IJM9  |
| <i>P. falciparum</i> | etramp10.1 | XM_001347268 | PF10_0019           | OG4_118692 | Q8IK21  |
| <i>P. falciparum</i> | etramp14.2 | XM_001348867 | PF14_0729           | OG4_84684  | Q8IK77  |
| <i>P. knowlesi</i>   | -          | XM_002260986 | PKH_030840          | OG4_84691  | B3KZZ2  |
| <i>P. knowlesi</i>   | -          | XM_002261140 | PKH_031940          | OG4_84523  | B3L0E6  |
| <i>P. knowlesi</i>   | -          | XM_002257972 | PKH_041730          | OG4_54905  | B3L0X6  |
| <i>P. knowlesi</i>   | -          | XM_002257989 | PKH_050120          | OG4_84661  | B3L0Z3  |
| <i>P. knowlesi</i>   | -          | XM_002258252 | PKH_052730          | OG4_64898  | B3L1Q6  |
| <i>P. knowlesi</i>   | -          | XM_002261648 | PKH_060100          | OG4_118797 | B3L1S8  |
| <i>P. knowlesi</i>   | -          | XM_002261815 | PKH_061760          | OG4_49514  | B3L295  |
| <i>P. knowlesi</i>   | -          | XM_002258601 | PKH_073400          | OG4_84706  | B3L333  |
| <i>P. knowlesi</i>   | -          | XM_002260476 | PKH_127030          | OG4_84684  | B3LA56  |
| <i>P. knowlesi</i>   | -          | XM_002261879 | PKH_140080          | OG4_48314  | B3LBI4  |

|                      |            |              |            |            |        |
|----------------------|------------|--------------|------------|------------|--------|
| <i>P. reichenowi</i> | -          | GU329527     | -          | -          | D3JXV2 |
| <i>P. vivax</i>      | -          | XM_001616903 | PVX_121950 | OG4_48314  | A5JZ15 |
| <i>P. vivax</i>      | -          | XM_001615979 | PVX_118680 | OG4_84684  | A5K448 |
| <i>P. vivax</i>      | -          | XM_001614817 | PVX_088870 | OG4_84661  | A5K5F5 |
| <i>P. vivax</i>      | -          | XM_001615088 | PVX_090230 | OG4_48457  | A5K676 |
| <i>P. vivax</i>      | -          | XM_001612902 | PVX_003565 | OG4_54905  | A5KBH5 |
| <i>P. vivax</i>      | -          | XM_001612721 | PVX_096070 | OG4_84523  | A5KC26 |
| <i>P. vivax</i>      | -          | XM_001612652 | PVX_001715 | OG4_118797 | A5KCB1 |
| <i>P. vivax</i>      | -          | XM_001608388 | PVX_111065 | OG4_49514  | A5KDQ5 |
| <i>P. vivax</i>      | -          | XM_001608277 | PVX_086915 | OG4_84706  | A5KE67 |
| <i>P. vivax</i>      | -          | XM_001616438 | PVX_084090 | OG4_84708  | A5KOB4 |
| <i>P. yoelii</i>     | 7506       | XM_723325    | PY07506    | OG4_50898  | Q7R7S2 |
| <i>P. yoelii</i>     | 6488       | XM_722055    | PY06488    | OG4_85057  | Q7RAL2 |
| <i>P. yoelii</i>     | 5433       | XM_720798    | PY05433    | OG4_85057  | Q7RDI9 |
| <i>P. yoelii</i>     | 4799       | XM_720054    | PY04799    | OG4_60511  | Q7RFA8 |
| <i>P. yoelii</i>     | 3869       | XM_718992    | PY03869    | OG4_64898  | Q7RHW4 |
| <i>P. yoelii</i>     | 3652       | XM_718746    | PY03652    | -          | Q7RIH1 |
| <i>P. yoelii</i>     | 3365       | XM_726274    | PY03365    | OG4_85057  | Q7RJ98 |
| <i>P. yoelii</i>     | 3011, UIS3 | XM_725879    | PY03011    | OG4_48314  | Q7RK90 |
| <i>P. yoelii</i>     | 2667       | XM_725486    | PY02667    | OG4_60733  | Q7RL79 |
| <i>P. yoelii</i>     | 0205       | XM_724753    | PY00205    | OG4_54905  | Q7RSZ6 |
| <i>P. yoelii</i>     | 0204, UIS4 | XM_724752    | PY00204    | OG4_84497  | Q7RSZ7 |

**Table S2.** A list of all primer sequences used in this study.

| <b>Primer name</b> | <b>Sequence (5' to 3', endonuclease sites underlined)</b> |
|--------------------|-----------------------------------------------------------|
| 0205 orfF          | GGAACAATCGCATTAGTAATTGGTACTACGCTTGG                       |
| 0205 orfR          | CAAATAACGTAAGTTATATCGATATGGGTTTGTA                        |
| 0205 Rep1F         | GGGGTACCCCATATAATTTTTTTGTATCCTTTAAAAAAC                   |
| 0205 Rep2R         | GCCCAAGCTTTCGGGCTAATGTAGATATAAATGCAACCTTG                 |
| 0205 Rep3F         | GGACTAGTCAAACCAATAAGATGGCAATAGTTCGAGGCA                   |
| 0205 Rep4R         | TCCCGCGGCAGATAAAAATATATACACGGTACTATTTGC                   |
| 0205 TestF         | GCGTGTAATTCAAAGAATGCG                                     |
| 0205 TestR         | CAGTTTACCACAACCAACAGTATTAATAGC                            |
|                    |                                                           |
| 2667 orfF          | CCTAATATTCCTAACCCAACCTGCTAATGCTC                          |
| 2667 orfR          | GTGGGGTTTCAGTATTTTCGGTGGTTTCAGG                           |
| 2667 Rep1F         | GGGGTACCTGGAGCTATGCATGCAAAAAACATCGCT                      |
| 2667 Rep2R         | GCCCAAGCTTCATCTAAAATCGCTTGCTATTATTTGGAAAC                 |
| 2667 Rep3F         | GGACTAGTGGCGCCTTTAAAATTGTATTGTATTATATGGG                  |
| 2667 Rep4R         | TCCCGCGGCAATATATTGGCGTATGATGTATGATTTGCC                   |
| 2667 TestF         | GCCTAAGAAAGTTGAATGAAAGATGTGCTTT                           |
| 2667 TestR         | CCGGTTGCATATATAATTGCACGTGTGAAC                            |
|                    |                                                           |
| 3365 orfF          | GCCTTTTTATTGGCCATAAATGTATTAACCTTAGG                       |
| 3365 orfR          | TCAGTAACTACAGTGGGATATTGGTGGATACTCT                        |
| 3365 Rep1F         | GGGGTACCGTTACTATTCTGGAATAACCACTACTCTTCG                   |
| 3365 Rep2R         | GCCCAAGCTTTTGTTCACGGTCCCTGGTTTATGAGTTTG                   |
| 3365 Rep3F         | GGACTAGTCCAAAATTCAAGTATATCACACATTCTG                      |
| 3365 Rep4R         | TCCCGCGGACTACATTTCCAACGTTATGTTAATACGG                     |
| 3365 TestF         | CCCCAAAATTATCTTCCAAAATTGTGGTC                             |
| 3365 TestR         | TTCAAGGGTTCAGGGTAGGGATTGGGT                               |
|                    |                                                           |
| 3652 orfF          | GAAATTAGCAAAAGCATTATATTTTTGTTGCCTT                        |
| 3652 orfR          | CGAATGGGTACCTTCATAATTAATTGGTTTGCC                         |
| 3652 Rep1F         | GGGGTACCCGCTATAAATTCATGAGAGATATTTATGAA                    |
| 3652 Rep2R         | GCCCAAGCTTTGTTTTGTGAAGCTGTGATATAGAAATATATCC               |
| 3652 Rep3F         | GGACTAGTCCATAAATACCATAAAATAATGGAAAACCATCACCA              |
| 3652 Rep4R         | TCCCGCGGACATATCAATCCTGGTTCTTAACGCAAACACA                  |
| 3652 TestF         | GTTTAACGTTTTATACGAACATATGTCATT                            |
| 3652 TestR         | ATATTTTCCAACGTCATTCTACAGCAGTAGC                           |
|                    |                                                           |
| 3869 orfF          | GGCCATAAAAGTGTTAATCCCAGGAGCTAACAA                         |
| 3869 orfR          | TGATAGTATATGGGGCAGTTGGGGTTCTGTTGCT                        |
| 3869 Rep1F         | GGGGTACCGTCCCGATAAAAATTGTTATAATAAAGAAGCTA                 |
| 3869 Rep2R         | GCCCAAGCTTGGGGATTATTGAATTATAAGAGTTTGTATAAA                |
| 3869 Rep3F         | GGACTAGTCTAATACCGAAGCTACATTTAAAATAATTCTCT                 |
| 3869 Rep4R         | TCCCGCGGGGAATCTGAGAATATATATAGCACAATTATAGTAC               |
| 3869 TestF         | GGGCCTAATAATTTTATGAATATTTAACCATCGCTA                      |
| 3869 TestR         | TGCTAGTTTCATGTGTTACTGCTTTAAAAATGAG                        |



|            |                                              |
|------------|----------------------------------------------|
|            |                                              |
| 4799 orfF  | GCAACATTAGCATTAGCAATTGCTACTACATTTG           |
| 4799 orfR  | GTGATGCTGGTGGATAAGCTCTTGAATTACCA             |
| 4799 Rep1F | GGGGTACCGACCCGATAAAAAATTGTTATTATAAAAGACCT    |
| 4799 Rep2R | GCCCAAGCTTGCTTTTGCTAATTTCAATTTTGCACATGT      |
| 4799 Rep3F | GGACTAGTGACAGTAGACCAAAATTTCAAGTATATCCCACA    |
| 4799 Rep4R | TCCCCGCGGCACGGTACTACTTACAATAAACAATAAATCACGGT |
| 4799 TestF | GTTGCTTGGGAAAGTATTTTTTCTAAATTATTTCT          |
| 4799 TestR | GTCTAACCATATATGTGAATTCGTAACATGT              |
|            |                                              |
| 5433 orfF  | GTATTAACCCCAGAATCTAATAATTATGTTGAAG           |
| 5433 orfR  | CATCAACGTAACATTTTATATTGAATCATTCTGATC         |
| 5433 Rep1F | GGGGTACCCACATTACAGCTTCACTAAAAAAAATATA        |
| 5433 Rep2R | GCCCAAGCTTCTGGGGTTAATACATTTATAGCTAATAAAAAGGC |
| 5433 Rep3F | GGACTAGTCAATTGTAACATCCCGTTCGGAAATTATAGT      |
| 5433 Rep4R | TCCCCGCGGGTGTGATGAAAATAATACCGAAATGTTGCA      |
| 5433 TestF | GCCTGAACCTGGAAATTAACCTGATATA                 |
| 5433 TestR | GTTAGTATTTTCGCATTTGGGCGGAGAAA                |
|            |                                              |
| 6488 orfF  | GCCTTTTTATTGGGCATAAATGTATTAACCCCAGG          |
| 6488 orfR  | CACTTACAAATAAAAAATATATGTCATGATAC             |
| 6488 Rep1F | GGGGTACCCCCCAATAAATCACCACACTATAACAGT         |
| 6488 Rep2R | GCCCAAGCTTTCGTGAAGATGTGATGTGGAAATATATCATG    |
| 6488 Rep3F | GGACTAGTCCCGTGATTTATTCTGTATTCCCAATAGTATC     |
| 6488 Rep4R | TCCCCGCGGGGGTGGGTTATATTGAATTATATATATCA       |
| 6488 TestF | CTATGAATATGTAACATCAAATATATTCTTTC             |
| 6488 TestR | CATATCATATTCCAAAATTTCAAGGGTTC                |
|            |                                              |
| 7506 orfF  | CAAGAAAGCCATCGCGATTGCATTAGGATC               |
| 7506 orfR  | GATTCTACTTTAGAAGATGTATCTGGTACAG              |
| 7506 Rep1F | GGGGTACCTGGCGAATGCCTATTCTAAAAGAACTAGC        |
| 7506 Rep2R | GCCCAAGCTTCCGCATAGTATTTAAATGTAAGGACATGC      |
| 7506 Rep3F | GGACTAGTGGTTCTGCTTTTAGCTCTACTGGGTCAAGT       |
| 7506 Rep4R | TCCCCGCGGCGGCATGTCATCGACTATTTAATACATAACC     |
| 7506 TestF | CCGGATAAAATTATATATATAATGGGGATTCC             |
| 7506 TestR | GCACACCATACATTATGAAAAGCGAATAAGCA             |
|            |                                              |
| TgF        | GGCTACGTCCCGCACGGACGAATCCAGATGG              |
| TgR        | CGCATTATAGAGTTCATTTTACACAATCC                |

**Table S3.** Numbers of salivary gland sporozoites obtained from PY03652KO and PY04799KO parasites are equivalent to wildtype.

| <b>Experiment</b> | <b>PY03652</b> | <b>PY04799</b> | <b>PyWT</b> |
|-------------------|----------------|----------------|-------------|
| 1                 | 60000          | 34000          | 8000        |
| 2                 | 33000          | 19000          | 51000       |
| 3                 | 42000          | 48000          | 47000       |
| 4                 | 25000          | 18000          | 14000       |
|                   |                |                |             |
| Avg               | 40000          | 29750          | 30000       |
| StDev             | 15033          | 14198          | 22136       |
| Ttest vs WT       | 0.487          | 0.986          | 1           |
